# Supplementary material
Source: publisher figshare collection journal article supplement (https://acs.figshare.com/ndownloader/files/4203109)
Supplement: Supplementary file 1 [file 4203109]

## Supporting Information

Effects of Perfluorocarbon Gases on the Size and Stability Characteristics of Phospholipid-Coated Microbubbles – Osmotic Effect versus Interfacial Film Stabilization

Csongor Szíjjártó, Simona Rossi, Gilles Waton, Marie Pierre Krafft\*

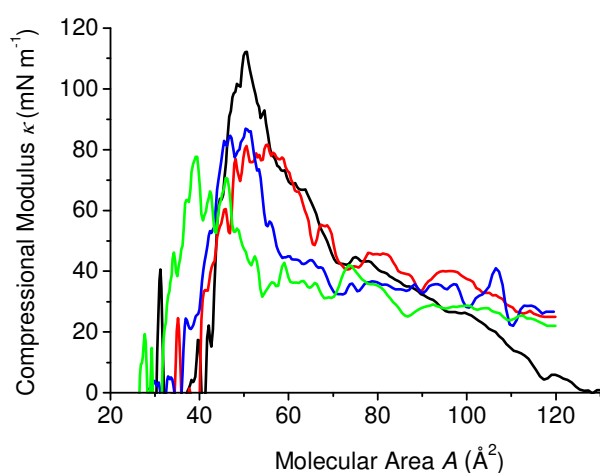

**Figure S1.** Variation of the compressional modulus of a DMPC monolayer in contact with air (black), *F*-hexane (red), *F*-diglyme (blue) and *F*-triglyme (green).

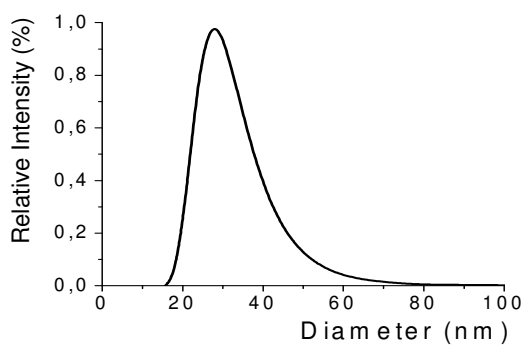

**Figure S2.** Mean diameter and size distribution of the DMPC vesicle dispersion used for adsorption rate determinations, as determined by QELS.
